# Supplementary material for: In situ reductive regeneration of zerovalent iron nanoparticles immobilized on cellulose for atom efficient Cr(vi) adsorption
Source: Royal Society of Chemistry journal article supplement (doi:10.1039/c5ra19917d), 2015-01-01
Supplement: c5ra19917d1.pdf [file c5ra19917d1.pdf]

## ***In-situ* Reductive Regeneration of nZVI Immobilized on Cellulose for Atom Efficient Cr(VI) Adsorption**

**Archana Kumari Sharma,<sup>a</sup> Rabindra Kumar,<sup>a</sup> Sunil Mittal,<sup>a</sup> Shamima Hussain,<sup>b</sup> Meenu Arora,<sup>c</sup> R.C. Sharma<sup>a</sup> and J. Nagendra Babu<sup>\*,d</sup>**

<sup>a</sup>Centre for Environmental Science & Technology, School of Environment and Earth Science, Central University of Punjab, Bathinda -151 001, Punjab, INDIA

<sup>b</sup>UGC-DAE Consortium for Scientific Research, Kalpakkam Node, Kokilamedu-603 104, Tamilnadu, INDIA

<sup>c</sup>Department of Chemistry, Multani Mal Modi College, Patiala,-147 001, Punjab, INDIA

<sup>d</sup>Centre for Environmental Science & Technology, School of Environment and Earth Science, Central University of Punjab, Bathinda -151 001, Punjab, INDIA

**Supporting information**

## **Experimental Section**

### **1. Chemicals**

All chemicals used in the experiments were of analytical grade. Microcrystalline cellulose Avicel PH-101® was procured from Sigma Aldrich (St. Louis, USA). Deionized water was used for preparation of all the reagents. Total chromium and Cr(VI) were determined using diphenylcarbazide method. Iron in C-nZVI was analysed by phenanthroline method, upon HNO<sub>3</sub>/H<sub>2</sub>SO<sub>4</sub> digestion of the sample. Hydroxyl amine hydrochloride and acetic acetate buffer for oxime reaction.

### **2. Synthesis of Microcrystalline Cellulose Immobilized Zerovalent Iron Nanoparticle (C-nZVI)**

MCC (3.50 g) was dissolved in 250 ml of deionized water for the synthesis of C-nZVI at room temperature. Upon dissolution, FeCl<sub>3</sub> (1.50 g) was added to reaction mixture with vigorous stirring. To this solution was added dropwise a 20% aqueous NaBH<sub>4</sub> solution (100 mL) at a rate of 1 mL/min. Upon subsequent addition of NaBH<sub>4</sub> solution, the reaction mixture turned black with foam formation. Excess of borohydride solution was added for complete reduction leading to the formation of suspended material. The black material was separated by filtration, washed with methanol and dried in vacuo.

### **3. Physical Characterization of C-nZVI**

Fourier Transformed Infra-Red (FTIR) spectra of Microcrystalline Cellulose (MCC), C-nZVI and chromium adsorbed C-nZVI, were recorded on a BRUKER TENSOR 27 instrument. Morphological characterization was obtained upon analysis of gold coated sample using Scanning Electron Microscope (SEM JSM-6610LV) and EDX using oxford. BET surface area experiment was carried out by Belsorp adsorption/desorption data analysis software under nitrogen environment using BEL Inc. (Japan) Surface Area Analyzer for the determination of pore diameter and surface area of the nZVI particle. Thermogravimetric analysis (TGA) was carried out at a heating rate of 10°C/min upto 500°C using a Shimadzu TG-60H TG analyzer under N<sub>2</sub> environment. X-ray diffraction (XRD) analysis was carried out using Pan analytical X'Pert-Pro model. X-Ray photoelectron spectroscopy (XPS) measurement was performed using PHOBIOS HSA3500 DLSEGD analyzer with excitation energy of 1486.74eV. CHNS elemental analysis was carried out using Thermo Finningan elemental analyser.

#### 4. Adsorption and Kinetics for Cr(VI) Adsorption by C-nZVI

Adsorption experiments were carried out by maintaining a 100 mL of Cr(VI) solution (1-10 mg/L) at pH 3. C-nZVI (10 mg) were added to the solutions and maintained under constant shaking at  $25\pm 2^\circ\text{C}$  for 24 h.

For the kinetic study, 10 mg of C-nZVI were added to a 100 mL solution of 10 mg/L Cr(VI) solution. The sample was, shaken at  $25\pm 2^\circ\text{C}$  for 24 h. A small aliquot was drawn and analysed at various time interval. The concentration of Cr(VI) adsorbed was plotted as a function of time. The kinetic data was studied for its pseudo–first order and pseudo–second order kinetic behaviour.

##### 4.1. Adsorption Experiment

A stock solution (1mM) of chromium was prepared in deionized water by dissolving 294 mg of  $\text{K}_2\text{Cr}_2\text{O}_7$  in 1000 mL of deionized water. Standard Cr(VI) solution (1-10) ppm, were prepared for adsorption study. To a 100 mL of Cr(VI) solution (1-10 ppm), 10 mg of C-nZVI was added and sample shaken at 200 rpm and  $25\pm 2^\circ\text{C}$  for 24h. upon equilibration for 24h the samples were filtered and analyzed.

##### 4.2. pH optimization study

The influence of pH on Cr(VI) removal was studied by varying the pH from 3-10. The pH of 3 ppm Cr(VI) solution was adjusted to 3,5, 7,8 and 10 using 1N HCl and NaOH solution. To a 100 ml of pH adjusted Cr(VI) solution, 10 mg of C-nZVI was added and shaken at  $25\pm 2^\circ\text{C}$ , 200 rpm for 24h. The solution was filtered and analyzed for chromium.

#### 5. Scanning Electron Microscopy (SEM)

To added 600 mg/L of C-nZVI to 40 mg/L of Chromium solution, maintain at pH3 and shaken for 24 h at 200 rpm. Filter the solution. The chromium adsorbed material was analyzed using SEM-EDX for the presence of chromium on to C-nZVI.

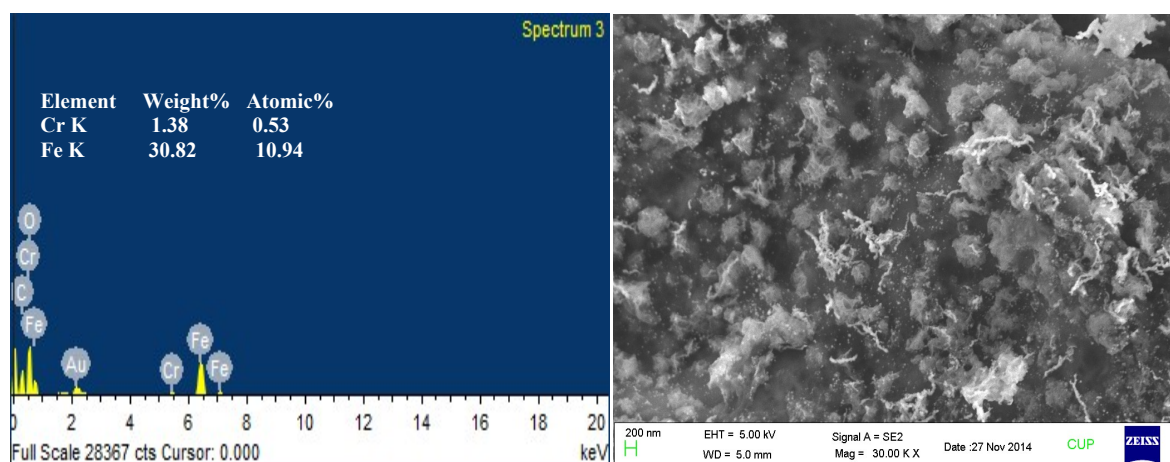

**Figure S1:** [A] SEM-EDX of chromium adsorbed C-nZVI [B] SEM image of Chromium adsorbed C-nZVI

6. Surface area analysis using BET analyzer

CSMCRI, Bhavnagar

ASAP 2010 V5.02 H                      Unit 1                      Serial # 2529                      Page 15

Sample: MC-NW  
 Operator: CSMCRI, Bhavnagar  
 Submitter:  
 File Name: C:\ASAP2010\2015\000-304.SMP

Started: 7/30/2015 12:35:48PM Analysis Adsorptive: N2  
 Completed: 7/30/2015 8:11:31PM Analysis Bath: 77.56 K  
 Report Time: 8/4/2015 10:15:15AM Thermal Correction: No  
 Sample Weight: 0.2160 g Smoothed Pressures: No  
 Warm Freespace: 16.0502 cm<sup>3</sup> Cold Freespace: 49.1835 cm<sup>3</sup>  
 MEASURED  
 Equil. Interval: 10 secs Low Pressure Dose: None

Summary Report

Area

|                                                                                                  |         |                   |
|--------------------------------------------------------------------------------------------------|---------|-------------------|
| Single Point Surface Area at P/Po 0.27789150 :                                                   | 9.8117  | m <sup>2</sup> /g |
| BET Surface Area:                                                                                | 9.5581  | m <sup>2</sup> /g |
| BJH Adsorption Cumulative Surface Area of pores<br>between 17.000000 and 3000.000000 A Diameter: | 8.3041  | m <sup>2</sup> /g |
| BJH Desorption Cumulative Surface Area of pores<br>between 17.000000 and 3000.000000 A Diameter: | 20.2141 | m <sup>2</sup> /g |

Volume

|                                                                                                         |          |                    |
|---------------------------------------------------------------------------------------------------------|----------|--------------------|
| Single Point Adsorption Total Pore Volume of pores less than<br>875.5091 A Diameter at P/Po 0.97737708: | 0.049088 | cm <sup>3</sup> /g |
| BJH Adsorption Cumulative Pore Volume of pores<br>between 17.000000 and 3000.000000 A Diameter:         | 0.048126 | cm <sup>3</sup> /g |
| BJH Desorption Cumulative Pore Volume of pores<br>between 17.000000 and 3000.000000 A Diameter:         | 0.049216 | cm <sup>3</sup> /g |

Pore Size

|                                                 |          |   |
|-------------------------------------------------|----------|---|
| Adsorption Average Pore Diameter (4V/A by BET): | 205.4316 | A |
| BJH Adsorption Average Pore Diameter (4V/A):    | 231.8160 | A |
| BJH Desorption Average Pore Diameter (4V/A):    | 97.3892  | A |

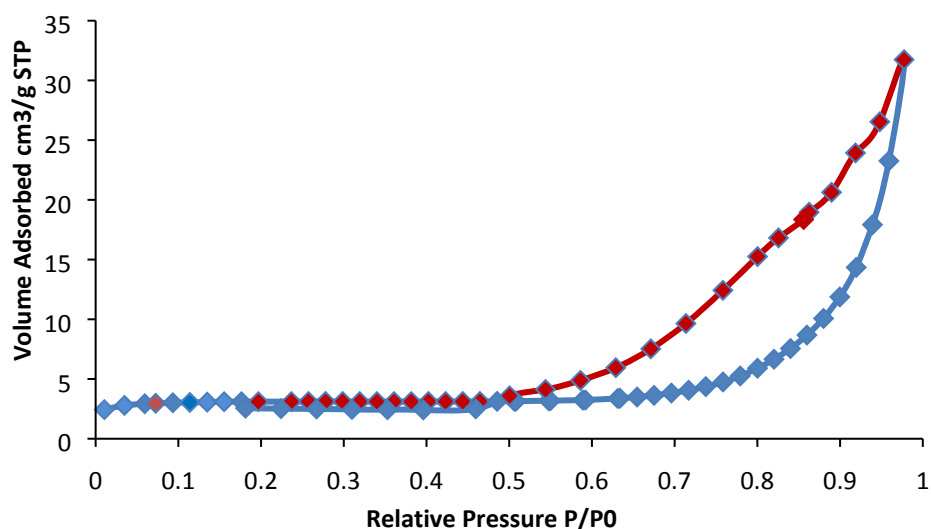

**Figure S2: Nitrogen desorption-adsorption isotherm for C-nZVI**

## 7. CHNS elemental analysis

CHNS elemental analysis of MCC, Fe<sup>3+</sup> treated cellulose and chromium adsorbed C-nZVI were carried out for the investigation of cellulose dialdehyde. The iron was removed from cellulose by stirred the material in 1N HCl solution for 1h. The solution was washed with dionised water 3-4 time, filter and dried. The amount of dialdehyde in cellulose is determined by shiff base oxime reaction. The presence of nitrogen in cellulose dialdehyde determined the amount dialdehyde in cellulose.

### a. Preparation of sample for CHNS analysis using Oxime reaction

The dride 100 mg of cellulose dialdehyde was placed in 250 ml round bottom flask. To this added 1.39 g of hydroxyl amine hydrochloride and 100 ml of 0.1M acetic acetate buffer. The mixture was stirred for 48 h. The sample was washed with deionised water, filtered and dride.

The results of CHNS elemental analysis are given below:

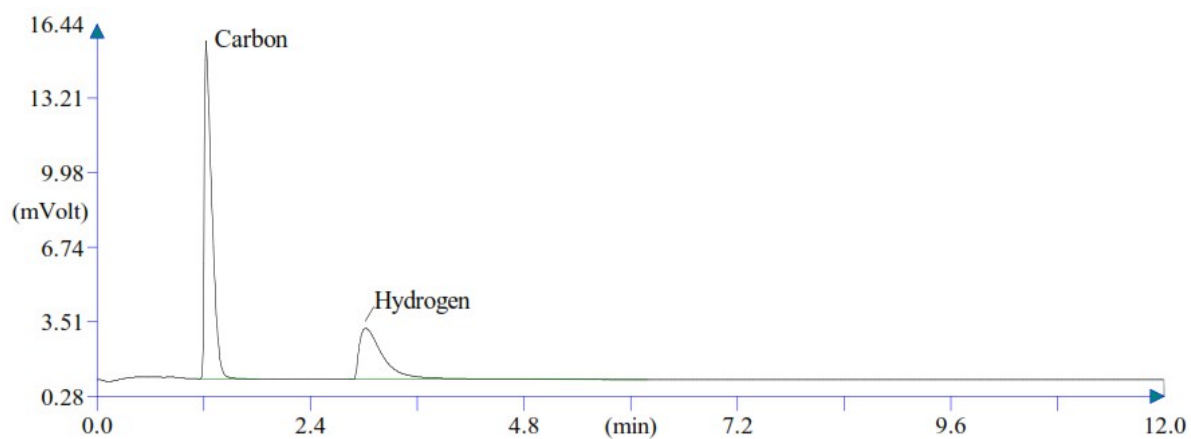

| Retention Time (min) | Component Name | Element % |
|----------------------|----------------|-----------|
| 1.225                | Carbon         | 41.460    |
| 3.017                | Hydrogen       | 6.291     |
|                      |                | 47.751    |

**Figure S3: CHN analysis of MCC**

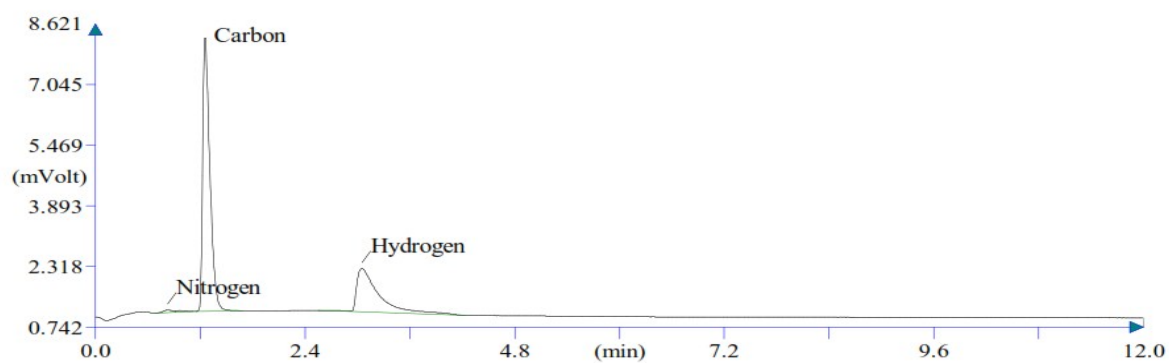

| Retention Time (min) | Component Name | Element % |
|----------------------|----------------|-----------|
| 0.825                | Nitrogen       | 1.244     |
| 0.958                |                | 0.000     |
| 1.258                | Carbon         | 41.802    |
| 2.575                |                | 0.000     |
| 3.050                | Hydrogen       | 6.352     |
|                      |                | 49.398    |

**Figure S4: CHN analysis of Fe<sup>3+</sup> treated cellulose**

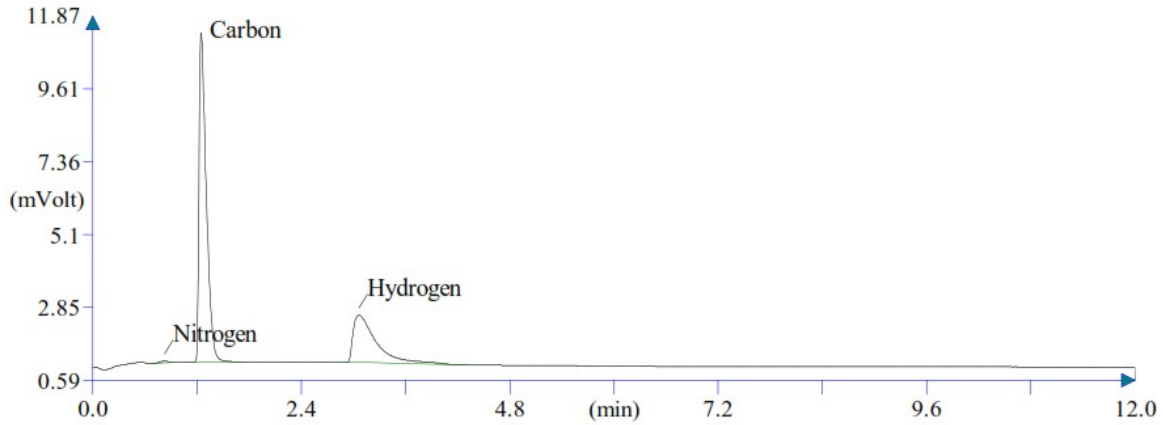

| Retention Time<br>(min) | Component Name | Element % |
|-------------------------|----------------|-----------|
| 0.825                   | Nitrogen       | 0.702     |
| 1.250                   | Carbon         | 42.353    |
| 3.067                   | Hydrogen       | 5.974     |
|                         |                | 49.028    |

**Figure S5: CHN analysis of Cr(VI) adsorbed C-nZVI cellulose dialdehyde**

### 8. Freundlich Adsorption isotherm model

Freundlich adsorption isotherm model is applied to non-ideal sorption on heterogeneous surfaces as well as multilayer sorption.

For a solute in solution as an adsorbate the nonlinear equation is given by

$$q_e = K_f C_e^{1/n}$$

Where  $K_f$  and  $n$  are the constants, which measure the adsorption capacity and intensity; respectively.

The equation is frequently used in the linear form by taking the logarithm of both sides.

Where  $C_e$  and  $n$  is equilibrium concentration of the adsorbate

$$\log q_e = \log K_f + \frac{1}{n} \log C_e$$

Thus, plotting  $\log q_e$  versus  $\log C_e$  gives a straight line graph with a slope of  $\left(\frac{1}{n}\right)$  and intercept of  $\log K_f$

The Freundlich constant  $K_f$  and  $\frac{1}{n}$  are related to the adsorption capacity and the adsorption intensity, respectively.

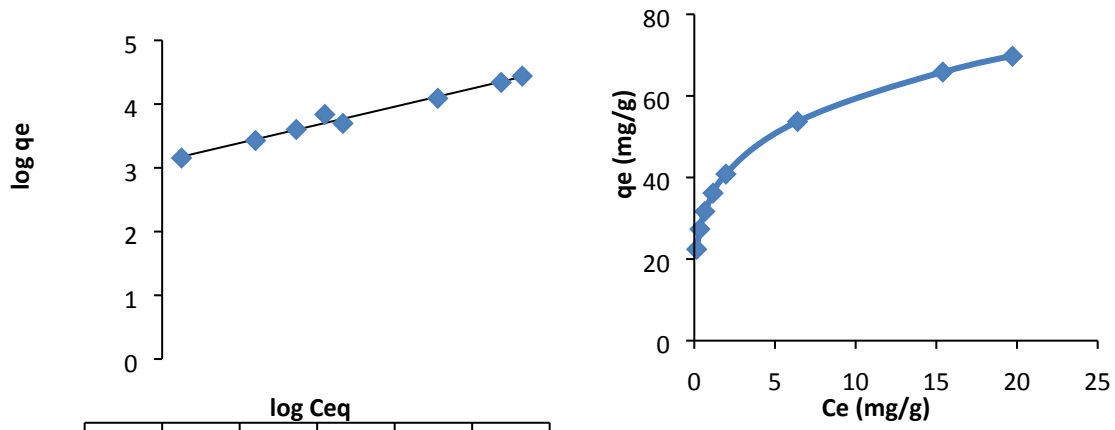

**Fig S6:** [A] Linear and [B] Nonlinear Freundlich isotherm of Cr(VI) adsorption by C-nZVI

The nonlinear fit for Freundlich isotherm was also calculated in Origin software. The parameters,  $K_f$  and  $n$  value were given below.



### Parameters

|    |   | Value    | Standard Error |
|----|---|----------|----------------|
| Qe | n | 4.31721  | 0.64675        |
|    | K | 34.94676 | 2.73532        |

Iterations Performed = 1  
 Total Iterations in Session = 7  
 Fit converged - tolerance criterion satisfied.

### Statistics

|                         | Qe             |
|-------------------------|----------------|
| Number of Points        | 8              |
| Degrees of Freedom      | 6              |
| Reduced Chi-Sqr         | 40.77263       |
| Residual Sum of Squares | 244.63575      |
| R Value                 | 0.95267        |
| Adj. R-Square           | 0.89219        |
| Root-MSE (SD)           | 6.38534        |
| Fit Status              | Succeeded(100) |

Fit Status Code :  
 100 : Fit converged

### Summary

|    | n       |                | K        |                | Statistics      |               |
|----|---------|----------------|----------|----------------|-----------------|---------------|
|    | Value   | Standard Error | Value    | Standard Error | Reduced Chi-Sqr | Adj. R-Square |
| Qe | 4.31721 | 0.64675        | 34.94676 | 2.73532        | 40.77263        | 0.89219       |

### ANOVA

|    |                   | DF | Sum of Squares | Mean Square | F Value   | Prob>F     |
|----|-------------------|----|----------------|-------------|-----------|------------|
| Qe | Regression        | 2  | 17309.49758    | 8654.74879  | 212.26862 | 6.55931E-6 |
|    | Residual          | 6  | 244.63575      | 40.77263    |           |            |
|    | Uncorrected Total | 8  | 17554.13333    |             |           |            |
|    | Corrected Total   | 7  | 2647.24444     |             |           |            |

### Fitted Curves Plot

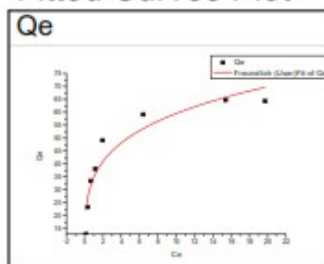

### Residual vs. Independent Plot

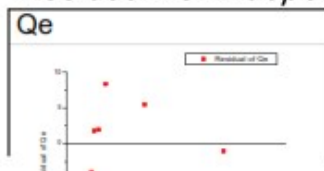

## 9. Langmuir Adsorption isotherm model

Irvine Langmuir (1916) provided a kinetic explanation of the isotherm assuming the following.

- (a) All the adsorption site are equivalent and uniformly spread over the surface of the adsorbent
- (b) Adsorbed molecule do not interact
- (c) Adsorption on the surface is independent of each entity of the adsorbate
- (d) Only monolayer adsorption of adsorbate occurs on the adsorbent

This isotherm is related to the amount of gas adsorbed on the surface of adsorbent to the partial pressure of the gas.

Thus, based on this approximation, the derived equation known as Non-linear Langmuir equation is

$$q_e = \frac{q_{max} k_L C_e}{1 + k_L C_e}$$

This model was used to show the relationship between amount of Chromium adsorbed at equilibrium  $q_e$  in mg/g, equilibrium solute concentration  $C_e$  in mg/L,  $q_{max}$  is  $q_e$  for a complete monolayer in mg/g,  $K_L$  is constant.

The value of Langmuir constant  $q_{max}$  and  $K_L$  value obtained by linear regression method using following equation,

$$\frac{C_e}{q_e} = \frac{1}{q_{max} K_L} + \frac{C_e}{q_{max}}$$

The values of  $K_L$  and  $q_{max}$  were computed from the slope and intercept of the linear Langmuir plot of  $1/q_e$  and  $1/C_{eq}$ .

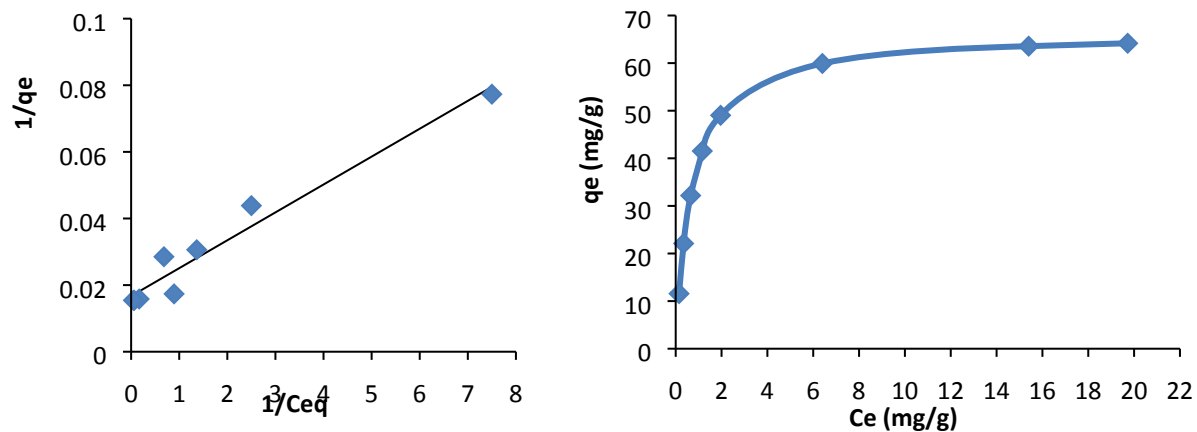

**Figure S7:** [A] Linear and [B] Nonlinear Langmuir isotherm of Cr(VI) adsorption by C-nZVI

The nonlinear fit for Langmuir isotherm was calculated in origin software. The parameters,  $K_L$  and  $q_{max}$  value were given below.

### Parameters

|    |    | Value    | Standard Error |
|----|----|----------|----------------|
| Qe | Qm | 66.42808 | 1.20113        |
|    | K  | 1.43857  | 0.10719        |

Iterations Performed = 1  
 Total Iterations in Session = 9  
 Fit converged - tolerance criterion satisfied.

### Statistics

|                         | Qe             |
|-------------------------|----------------|
| Number of Points        | 8              |
| Degrees of Freedom      | 6              |
| Reduced Chi-Sqr         | 3.06364        |
| Residual Sum of Squares | 18.38186       |
| R Value                 | 0.99652        |
| Adj. R-Square           | 0.9919         |
| Root-MSE (SD)           | 1.75033        |
| Number of Iterations    | 1              |
| Fit Status              | Succeeded(100) |

Fit Status Code :  
 100 : Fit converged

### Summary

|    | Qm       |                | K       |                | Statistics      |               |
|----|----------|----------------|---------|----------------|-----------------|---------------|
|    | Value    | Standard Error | Value   | Standard Error | Reduced Chi-Sqr | Adj. R-Square |
| Qe | 66.42808 | 1.20113        | 1.43857 | 0.10719        | 3.06364         | 0.9919        |

### ANOVA

|    |                   | DF | Sum of Squares | Mean Square | F Value    | Prob>F     |
|----|-------------------|----|----------------|-------------|------------|------------|
| Qe | Regression        | 2  | 17535.75147    | 8767.87573  | 2861.91073 | 2.86383E-9 |
|    | Residual          | 6  | 18.38186       | 3.06364     |            |            |
|    | Uncorrected Total | 8  | 17554.13333    |             |            |            |
|    | Corrected Total   | 7  | 2647.24444     |             |            |            |

### Fitted Curves Plot

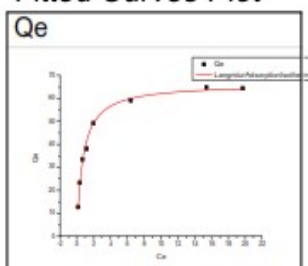

### Residual vs. Independent Plot

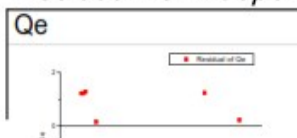

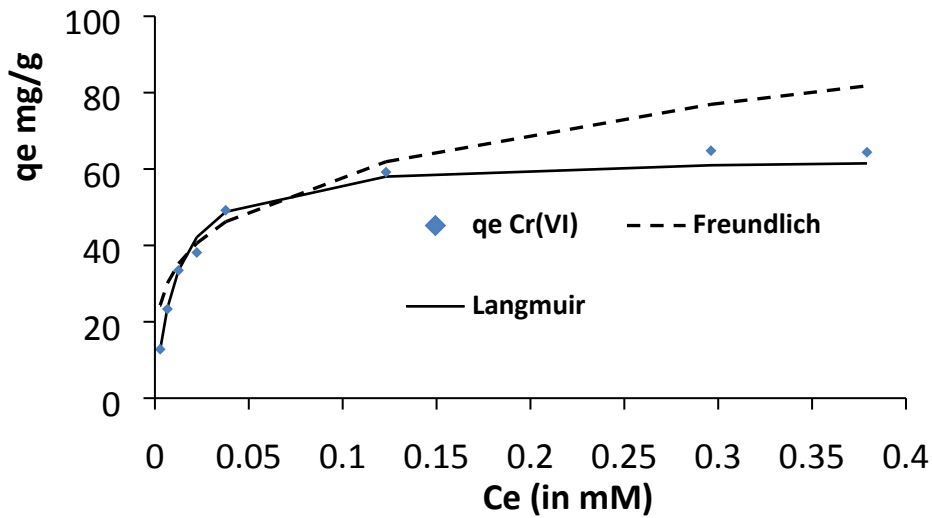

**Figure S8:** Linear adsorption isotherm of Cr(VI) adsorption by C-nZVI

### 10. Multilayer adsorption model

Multilayer adsorption is a multilayer surface phenomenon in which the first layer of adsorbate on adsorbent a solid material is covered by second layer of adsorbate. The first layered covered adsorbent doesnot take part in adsorption process, only uncovered first layer participate in adsorption.

The nonlinear multilayer adsorption equation are as follows:

$$q_e = \frac{Q_m K_1 C_e}{(1 - K_2 C_e)[1 + (K_1 - K_2)C_e]}$$

Where,  $Q_m$  is adsorption maximum,  $K_1$  and  $K_2$  is equilibrium adsorption constants for first and second layer respectively,  $C_e$  is equilibrium constant.

Nonlinear Curve Fit (MultilayerFunction (User)) (7/20/2015 13:14:44)

Input Data

|       | Dep/Indep | Data  | Range                | Weight Type |              |
|-------|-----------|-------|----------------------|-------------|--------------|
| Book1 | ce        | Indep | [Book1]Sheet1!A"ceq" | [1:8]       | No Weighting |
|       | qe        | Dep   | [Book1]Sheet1!B"qe"  | [1:8]       | No Weighting |

Parameters

|       |    | Value    | Standard Error |
|-------|----|----------|----------------|
| Book1 | Qm | 66.42808 | 1.31577        |
|       | K1 | 1.43857  | 0.11742        |
|       | K2 | 0        | 0              |

Reduced Chi-sqr = 3.67637285022

COD(R<sup>2</sup>) = 0.99305622709317

Iterations Performed = 5

Total Iterations in Session = 9

Fit converged. Chi-Sqr tolerance value of 1E-9 was reached.

Statistics

|                         | Book1          |
|-------------------------|----------------|
| Number of Points        | 8              |
| Degrees of Freedom      | 5              |
| Reduced Chi-Sqr         | 3.67637        |
| Residual Sum of Squares | 18.38186       |
| Adj. R-Square           | 0.99028        |
| Fit Status              | Succeeded(100) |

Fit Status Code :

100 : Fit converged. Chi-Sqr tolerance value of 1E-9 was reached.

Summary

|       | Qm       |                | K1      |                | K2    |                | Statistics      |               |
|-------|----------|----------------|---------|----------------|-------|----------------|-----------------|---------------|
|       | Value    | Standard Error | Value   | Standard Error | Value | Standard Error | Reduced Chi-Sqr | Adj. R-Square |
| Book1 | 66.42808 | 1.31577        | 1.43857 | 0.11742        | 0     | 0              | 3.67637         | 0.99028       |

ANOVA

|       |                   | DF | Sum of Squares | Mean Square | F Value   | Prob>F     |
|-------|-------------------|----|----------------|-------------|-----------|------------|
| Book1 | Regression        | 3  | 17535.75147    | 5845.25049  | 1589.9504 | 9.76529E-8 |
|       | Residual          | 5  | 18.38186       | 3.67637     |           |            |
|       | Uncorrected Total | 8  | 17554.13333    |             |           |            |
|       | Corrected Total   | 7  | 2647.24444     |             |           |            |

Fitted Curves Plot

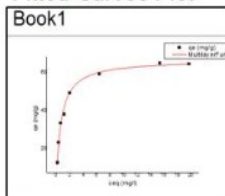

Residual vs. Independent Plot

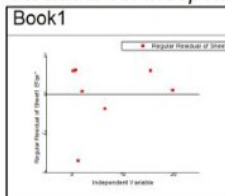

## 11. Kinetics study

For the investigation of mechanism of reduction, mass transport and chemical reaction process between C-nZVI and Cr(VI), pseudo first order and pseudo second order kinetics models are used.

Pseudo-first-order model is expressed as

$$\ln(q_e - q_t) = \ln q_e - Kt$$

$q_e$  = amount of chromium adsorbed at an equilibrium in (mg/g)

$q_t$  = amount of chromium adsorbed at time t

K = rate constant of pseudo-first-order reaction

Pseudo-second-order is expressed as

$$t/q_t = 1/k_p q_e^2 + t/q_e$$

$K_p$  = Pseudo-second-order rate constant

$$\text{rate} = [\text{Cr}]^a [\text{Fe}]^b$$

$$\text{rate} = k[\text{Cr}]_o - [r]_t - [\text{Cr}]_o + [\text{Cr}]_t q_e$$

$$\text{rate} = k[\text{Cr}]_t q_e - [\text{Cr}]_t$$

$$\text{rate} = k[\text{Cr}]_t q_e$$

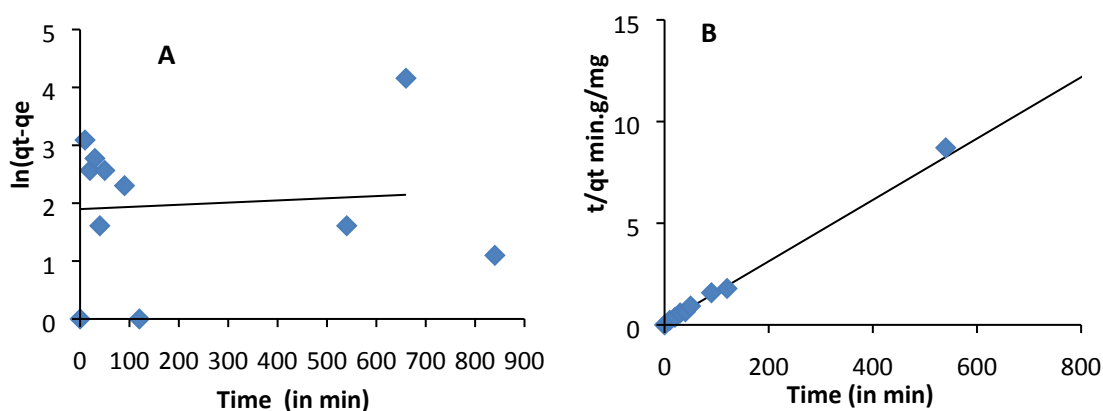

**Figure S9:** [A] Pseudo First order and [B] Pseudo Second order kinetic model of C-nZVI

**12. Normalized maximum adsorption:** the smallest amount of material which expresses the adsorption maximum of analytes per gram of adsorbent.

$$\text{Normalized adsorption value} = q_{\text{max}} * 100 / \% \text{Fe}$$

### 13. XPS analysis of C-nZVI and chromium adsorbed C-nZVI

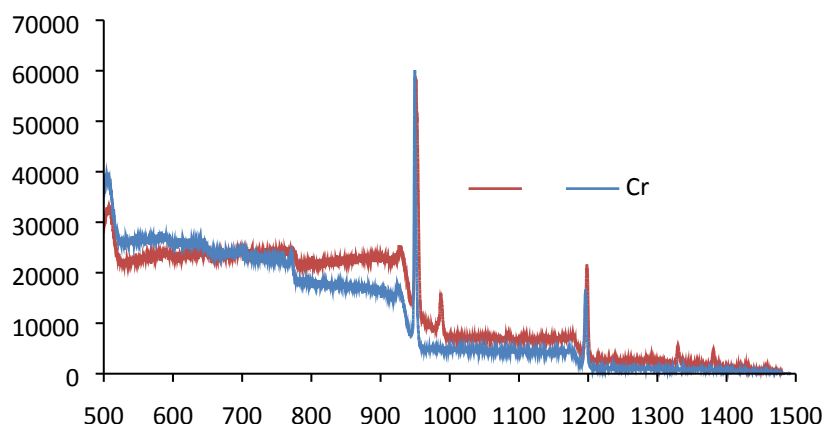

**Figure S10:** XPS picture of C-nZVI and chromium adsorbed C-nZVI

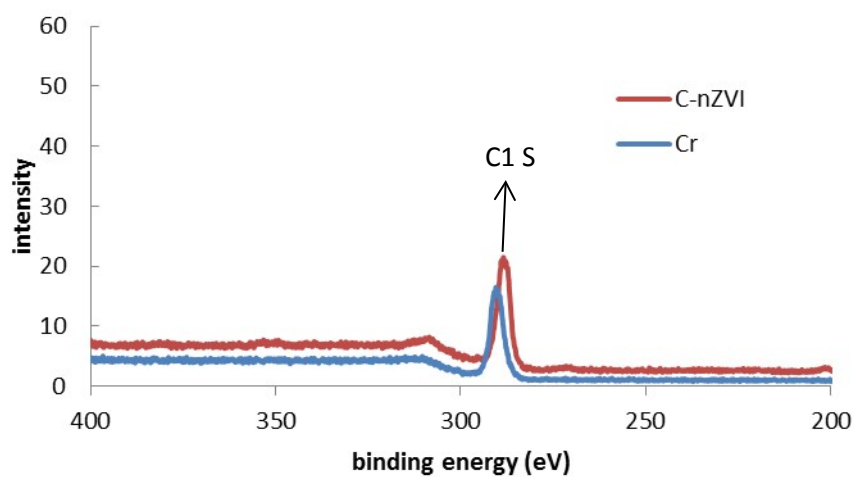

**Figure S11:** C 1s XPS spectra of C-nZVI and chromium adsorbed C-nZVI

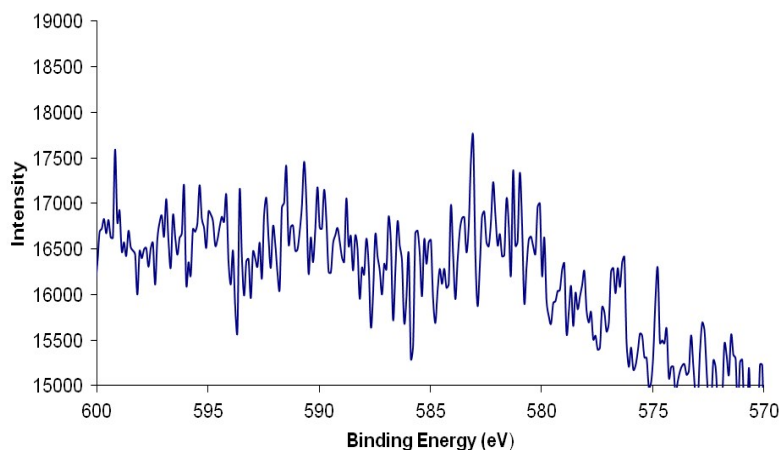

**Figure S12:** XPS analysis of chromium adsorbed C-nZVI
